# Supplementary material
Source: publisher site journal article supplement (https://www.dovepress.com/article/307920)

Predictive Value of The CONUT Score Combined With The Fibrinogen–Albumin Ratio In Postoperative  
Local Recurrence-Free Survival Of Patients With Retroperitoneal Liposarcoma

Guo-Qiang Xue<sup>1</sup>, Cheng-Peng Li<sup>1</sup>, Ang lv<sup>1</sup>, Xiu-Yun Tian<sup>1</sup>, Jian-Hui Wu<sup>1</sup>, Hui Qiu<sup>1</sup>, Chun-Yi Hao<sup>1</sup>

<sup>1</sup> Key Laboratory of Carcinogenesis and Translational Research (Ministry of Education/Beijing),  
Department of Hepato-Pancreato-Biliary Surgery, Peking University Cancer Hospital & Institute, Beijing,  
People's Republic of China.

***Corresponding author:***

Professor Chunyi Hao

Address: Key laboratory of Carcinogenesis and Translational Research (Ministry of  
Education/Beijing), Department of Hepato-Pancreato-Biliary Surgery, Peking University Cancer  
Hospital & Institute, No. 52 Fucheng Road, Haidian District, Beijing, People's Republic of China.

Telephone: +86-10-88196182

Fax: +86-10-88196548

Email: haochunyi@bjmu.edu.cn

**Supplementary Material Captions:**

**Table S1** Scoring system for the CONUT.....3

**Table S2** Estimated AUCs of FAR, NLR, PLR, CONUT score and CONUT-FAR score in predicting LRFS at various time points.....4

**Figure S1** X-tile analyses to determine the optimal cutoff values of (a)NLR, (b)PLR, (c) FAR, (d) CONUT, and (e) CONUT-FAR. The optimal cutoff value of NLR, PLR, FAR, CONUT and CONUT-FAR score were 3.6, 153.3, 16.9%, 5 and 11, respectively.....5

**Table S1** Scoring system for the CONUT

| Parameter                                 | Undernutrition degree |           |           |          |
|-------------------------------------------|-----------------------|-----------|-----------|----------|
|                                           | None                  | Light     | Moderate  | Severe   |
| Serum albumin (g/dL)                      | $\geq 3.50$           | 3.00-3.49 | 2.50-2.99 | $< 2.50$ |
| I. Albumin score                          | 0                     | 2         | 4         | 6        |
| Total lymphocyte (count/mm <sup>3</sup> ) | $\geq 1600$           | 1200-1599 | 800-1199  | $< 800$  |
| II. Total lymphocyte score                | 0                     | 1         | 2         | 3        |
| Total cholesterol (mg/dL)                 | $\geq 180$            | 140-179   | 100-139   | $< 100$  |
| III. Total cholesterol score              | 0                     | 1         | 2         | 3        |

CONUT is calculated as the sum of the scores of I, II, and III.

**Table S2.** Estimated AUCs of FAR, NLR, PLR, CONUT score and CONUT-FAR score in predicting

LRFS at various time points

| Time    | after | AUC of FAR | AUC   | of | AUC   | of | AUC   | of | AUC   | of | CONUT- |
|---------|-------|------------|-------|----|-------|----|-------|----|-------|----|--------|
| surgery |       |            | NLR   |    | PLR   |    | COUNT |    | FAR   |    |        |
| LRFS    |       |            |       |    |       |    |       |    |       |    |        |
| 1 year  |       | 0.719      | 0.697 |    | 0.701 |    | 0.729 |    | 0.776 |    |        |
| 3 years |       | 0.692      | 0.617 |    | 0.631 |    | 0.675 |    | 0.704 |    |        |
| 5 years |       | 0.670      | 0.539 |    | 0.581 |    | 0.751 |    | 0.796 |    |        |

AUC area under the time-dependent ROC curve, NLR neutrophil-lymphocyte ratio, PLR platelet-lymphocyte ratio, FAR Fibrinogen-Albumin Ratio, CONUT controlling nutritional status, LRFS, local recurrence-free survival

**Figure S1** X-tile analyses to determine the optimal cutoff values of (a)NLR, (b)PLR, (c) FAR, (d) CONUT, and (e) CONUT-FAR. The optimal cutoff value of NLR, PLR, FAR, CONUT and CONUT-FAR score were 3.6, 153.3, 16.9%, 5 and 11, respectively.

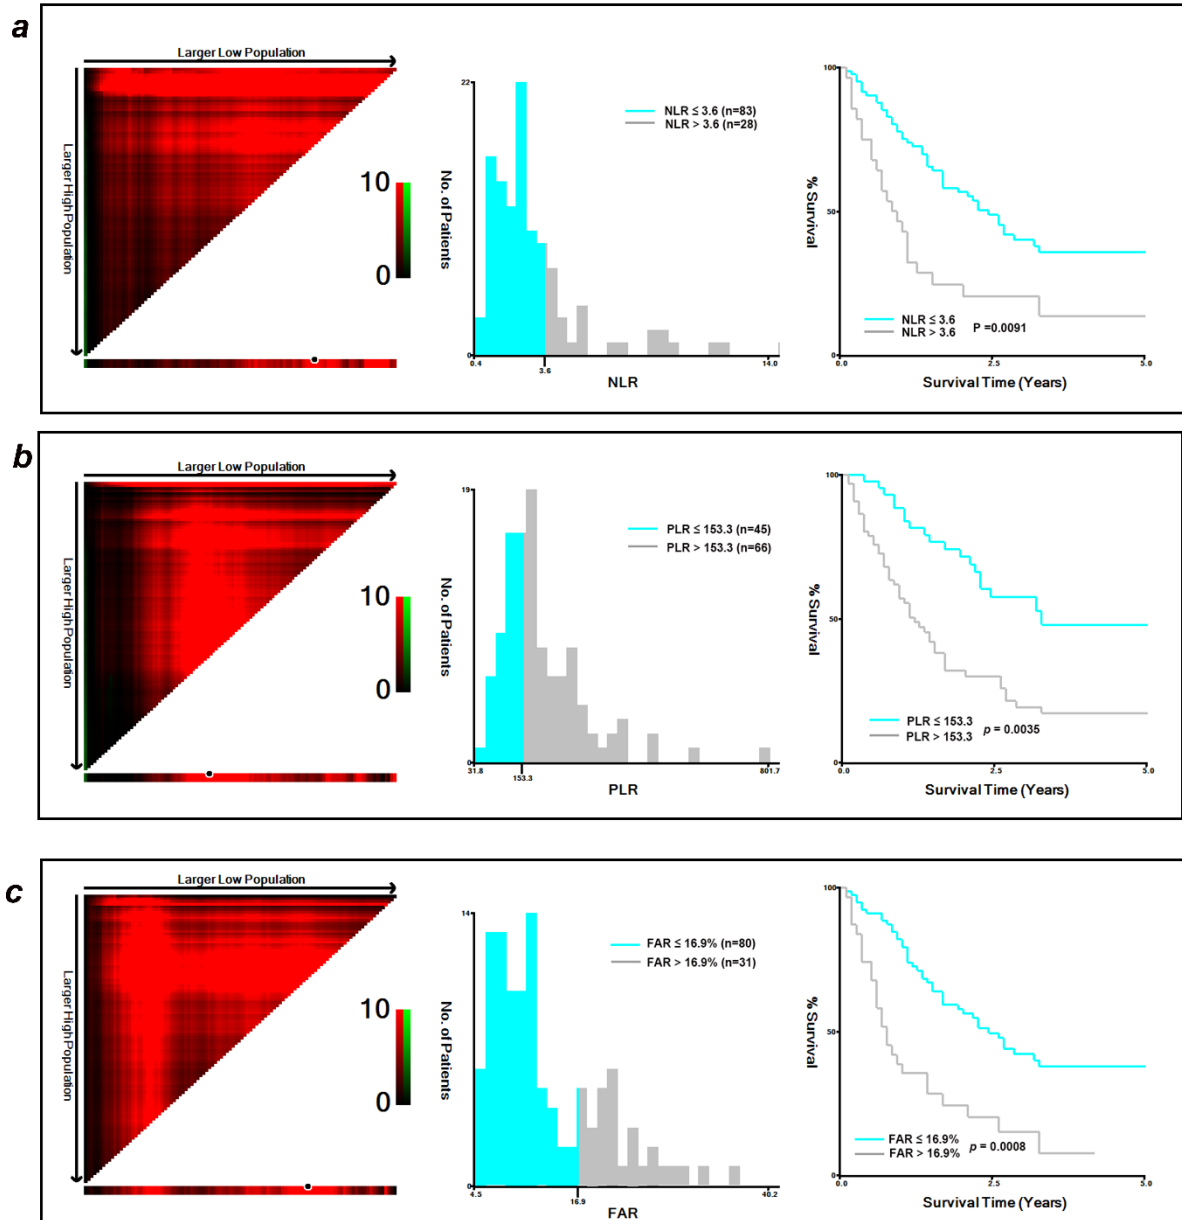

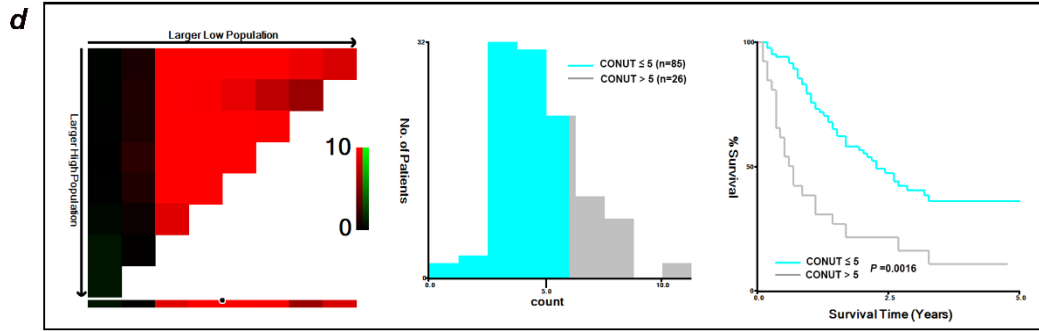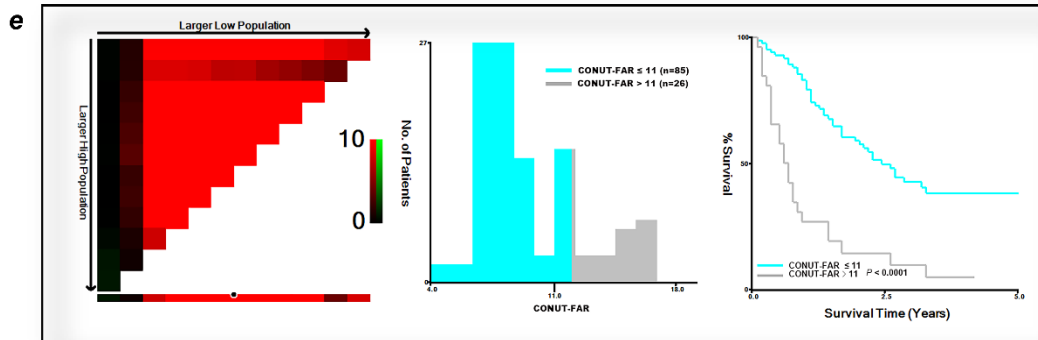

Supplement: Supplementary file 1 [file get_supplementary_file.php]
